# Supplementary material for: Antibiotic Resistance of Enterococcus Species in Ornamental Animal Feed
Source: MDPI journal article supplement (doi:10.3390/ani13111761), 2023-05-26
Supplement: s1 [file s1]

Supplementary material

# Antibiotic Resistance of *Enterococcus* species in ornamental animal feed

Rúben Soares <sup>1</sup>, Carla Miranda <sup>1,3,†,\*</sup>, Sandra Cunha <sup>1</sup>, Luís Ferreira <sup>1</sup>, Ângela Martins <sup>4,5,6</sup>, Gilberto Igrejas <sup>2,7,8</sup> and Patrícia Poeta <sup>1,2,5,6</sup>

- <sup>1</sup> Microbiology and Antibiotic Resistance Team (MicroART), Department of Veterinary Sciences, University of Trás-os Montes e Alto Douro, 5000-801 Vila Real, Portugal; rubensoares297@gmail.com; sandra\_mdc97@hotmail.com; luisferreira\_12@hotmail.com; carlisabelmi@utad.pt; ppoeta@utad.pt
  - <sup>2</sup> Associated Laboratory for Green Chemistry (LAQV-REQUIMTE), University NOVA of Lisbon, 1099-085 Caparica, Portugal;
  - <sup>3</sup> Toxicology Research Unit (TOXRUN), University Institute of Health Sciences – CESPU (IUCS-CESPU), 4585-116 Gandra, Portugal;
  - <sup>4</sup> Department of Zootechnics, University of Trás-os Montes e Alto Douro, Vila Real, Portugal; angela@utad.pt.
  - <sup>5</sup> Veterinary and Animal Research Centre (CECAV), University of Trás-os Montes e Alto Douro, 5000-801 Vila Real, Portugal;
  - <sup>6</sup> Veterinary and Animal Research Centre, Associate Laboratory for Animal and Veterinary Science (AL4AnimalS), Vila Real, Portugal.
  - <sup>7</sup> Department of Genetics and Biotechnology, University of Trás-os-Montes e Alto Douro, 5000-801 Vila Real, Portugal; gigrejas@utad.pt
  - <sup>8</sup> Functional Genomics and Proteomics Unit, University of Trás-os-Montes e Alto Douro, 5000-801 Vila Real, Portugal;
- † These authors contributed equally to this work.  
\* Correspondence: carlisabelmi@utad.pt.

**Citation:** Soares, R.; Miranda, C.; Cunha, S.; Ferreira, L.; Martins, A.; Igrejas, G.; Poeta, P. Antibiotic Resistance of *Enterococcus* species in ornamental animal feed. *Animals* **2023**, *13*, x. <https://doi.org/10.3390/xxxxx>

Academic Editor: Firstname  
Lastname

Received: date  
Accepted: date  
Published: date

**Publisher's Note:** MDPI stays neutral with regard to jurisdictional claims in published maps and institutional affiliations.

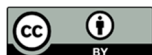

**Copyright:** © 2023 by the authors. Submitted for possible open access publication under the terms and conditions of the Creative Commons Attribution (CC BY) license (<https://creativecommons.org/licenses/by/4.0/>).

**Supplementary Materials:** The following supporting information can be downloaded at: [www.mdpi.com/xxx/s1](http://www.mdpi.com/xxx/s1), Table S1: Total count of microorganisms in bird, fish, reptile, and mammal food samples in colony forming unit per gram (CFU/g); Table S2: Phenotypic, genotypic and virulent profile of the 60 selected *Enterococcus* isolates based on food origin.

**Table S1.** Total count of microorganisms in bird, fish, reptile, and mammal food samples in colony forming unit per gram (CFU/g).

| Birds  |       | Fish   |       | Reptiles |       | Mammals |       |
|--------|-------|--------|-------|----------|-------|---------|-------|
| Sample | CFU/g | Sample | CFU/g | Sample   | CFU/g | Sample  | CFU/g |
| A1     | 30    | P1     | 0     | R1       | 20    | M1      | 260   |
| A2     | 0     | P2     | 0     | R2       | 800   | M2      | 200   |
| A3     | 250   | P3     | 130   | R3       | 2400  |         |       |
| A4     | 0     | P4     | 100   | R4       | 10    |         |       |
| A5     | 830   | P5     | 10    | R5       | 10000 |         |       |
| A6     | 600   | P6     | 120   | R6       | 100   |         |       |
| A7     | 320   | P7     | 0     | R7       | 0     |         |       |
| A8     | 3600  | P8     | 20    |          |       |         |       |
| A9     | 27000 | P9     | 100   |          |       |         |       |
| A10    | 70    | P10    | 170   |          |       |         |       |
| A11    | 1100  | P11    | 10    |          |       |         |       |
| A12    | 20    | P12    | 60    |          |       |         |       |
| A13    | 110   | P13    | 43000 |          |       |         |       |
| A14    | 50    | P14    | 10    |          |       |         |       |
| A15    | 400   | P15    | 10    |          |       |         |       |
| A16    | 60    | P16    | 20    |          |       |         |       |
| A17    | 440   | P17    | 20    |          |       |         |       |
| A18    | 1900  | P18    | 10    |          |       |         |       |
| A19    | 10    | P19    | 10000 |          |       |         |       |
| A20    | 200   | P20    | 10    |          |       |         |       |
| A21    | 120   | P21    | 20    |          |       |         |       |
| A22    | 0     | P22    | 0     |          |       |         |       |
| A23    | 1800  |        |       |          |       |         |       |
| A24    | 3100  |        |       |          |       |         |       |
| A25    | 83000 |        |       |          |       |         |       |
| A26    | 0     |        |       |          |       |         |       |

**Table S2.** Phenotypic, genotypic and virulent profile of the 60 selected *Enterococcus* isolates based on food origin.

| Sample | Food origin | Species              | Phenotypic profile  | Genotypic profile                                                  | Virulent profile                       |
|--------|-------------|----------------------|---------------------|--------------------------------------------------------------------|----------------------------------------|
| P3(2)  | Fish        | <i>E. faecium</i>    | RD                  | <i>ermB-tetK-tetL-vanA</i>                                         | -----                                  |
| P3(4)  | Fish        | <i>E. faecalis</i>   | RD                  | -----                                                              | <i>esp-cylM</i>                        |
| P4(1)  | Fish        | <i>E. faecium</i>    | RD                  | <i>ermB-tetL</i>                                                   | <i>cylL</i>                            |
| P4(2)  | Fish        | <i>E. faecium</i>    | TET-ERY-RD          | <i>ermB-tetL</i>                                                   | <i>cylL</i>                            |
| P3(V3) | Fish        | <i>E. faecium</i>    | VAN-TEC-F-FOS       | <i>ermB-tetK-tetL-vanA</i>                                         | -----                                  |
| P10(2) | Fish        | <i>E. faecium</i>    | CIP-RD              | <i>ermB-tetL</i>                                                   | <i>cylL</i>                            |
| P11(1) | Fish        | <i>E. gallinarum</i> | TET-ERY-RD          | <i>ermB-tetM-ant(6)-Ia</i>                                         | <i>esp-gelE-cpd-cylL</i>               |
| P11(2) | Fish        | <i>E. durans</i>     | TET-ERY-RD          | <i>ermB-tetM-tetL-vatE-vanA-ant(6)-Ia</i>                          | <i>gelE-agg-cylM-cylL</i>              |
| P12(1) | Fish        | <i>E. durans</i>     | TET-ERY-QD          | <i>ermB-tetM-tetL-vatD-ant(6)-Ia</i>                               | <i>esp-gelE-agg-cylA-cylM-cylL</i>     |
| P12(2) | Fish        | <i>E. durans</i>     | TET-ERY-QD          | <i>ermB-tetK-tetM-tetL-aac(6')-aph(2'')-Ia-catA-vanA-ant(6)-Ia</i> | <i>esp-gelE-agg-cpd-cylA-cylM-cylL</i> |
| P12(4) | Fish        | <i>E. gallinarum</i> | TET-ERY-QD          | <i>ermB-tetM-tetL-catA-vanA-ant(6)-Ia</i>                          | <i>esp-gelE-agg-cpd-cylA-cylM-cylL</i> |
| P13(2) | Fish        | <i>E. faecalis</i>   | ERY                 | <i>tetM-ant(6)-Ia</i>                                              | <i>esp-gelE-agg-cpd-cylM-cylL</i>      |
| P13(3) | Fish        | <i>E. faecalis</i>   | ERY                 | <i>tetM</i>                                                        | <i>esp-cpd-cylB-cylM-cylL</i>          |
| P19(4) | Fish        | <i>E. faecium</i>    | CIP-F-RD-LNZ        | <i>ermA-ermC-vatE-vanB-ant(6)-Ia</i>                               | -----                                  |
| P20(2) | Fish        | <i>E. faecalis</i>   | CIP-F-RD            | <i>vanB</i>                                                        | -----                                  |
| P20(3) | Fish        | <i>E. faecalis</i>   | TET-CIP-RD          | -----                                                              | <i>cylL</i>                            |
| P20(4) | Fish        | <i>E. faecium</i>    | TET-ERY-CIP-C-QD-RD | <i>vanB-ant(6)-Ia</i>                                              | <i>cylL</i>                            |
| P21(1) | Fish        | <i>E. faecalis</i>   | CIP-RD-LNZ          | -----                                                              | -----                                  |
| P21(2) | Fish        | <i>E. faecalis</i>   | CIP-RD              | <i>ermB</i>                                                        | -----                                  |
| A3(1)  | Bird        | <i>E. faecium</i>    | ERY- RD             | <i>ermB-tetL</i>                                                   | <i>agg</i>                             |
| A5(1)  | Bird        | <i>E. faecium</i>    | TET-ERY- RD         | <i>ermB-tetL</i>                                                   | <i>cylL</i>                            |
| A6(1)  | Bird        | <i>E. faecium</i>    | ---                 | <i>ermB-ermC-tetL-vanA-ant(6)-Ia</i>                               | -----                                  |
| A6(3)  | Bird        | <i>E. gallinarum</i> | TET-ERY             | <i>ermB-tetK-tetM-catA-vanA-ant(6)-Ia</i>                          | <i>esp-gelE-cylL</i>                   |
| A7(1)  | Bird        | <i>E. gallinarum</i> | RD                  | <i>ermB-tetM-tetL-ant(6)-Ia</i>                                    | <i>esp-gelE-agg-cpd-cylB-cylL</i>      |
| A7(2)  | Bird        | <i>E. gallinarum</i> | RD                  | <i>ermB-tetK-tetL-catA-vanA-ant(6)-Ia</i>                          | <i>esp</i>                             |
| A7(4)  | Bird        | <i>E. faecalis</i>   | TET-RD              | <i>tetM-ant(6)-Ia</i>                                              | <i>esp-cylB-cylM</i>                   |
| A7(5)  | Bird        | <i>E. faecalis</i>   | TET-RD              | <i>tetM</i>                                                        | <i>cpd-cylM</i>                        |
| A7(6)  | Bird        | <i>E. faecalis</i>   | TET-RD              | <i>tetK</i>                                                        | -----                                  |
| A7(7)  | Bird        | <i>E. faecalis</i>   | ---                 | <i>vatE</i>                                                        | <i>esp-cylL</i>                        |
| A7(8)  | Bird        | <i>E. faecalis</i>   | ---                 | <i>tetL-vatE</i>                                                   | <i>esp-cylL</i>                        |
| A9(1)  | Bird        | <i>E. faecium</i>    | RD                  | <i>ermB-ermC-tetK-tetL-vanA-ant(6)-Ia</i>                          | -----                                  |
| A9(2)  | Bird        | <i>E. durans</i>     | ---                 | <i>ermB-tetK-tetM-tetL-catA-vatD-ant(6)-Ia</i>                     | <i>cylL</i>                            |
| A9(3)  | Bird        | <i>E. faecalis</i>   | ---                 | <i>tetM-tetL-catA-vatD-vanA-ant(6)-Ia</i>                          | <i>esp-gelE-cylM-cylL</i>              |
| A9(4)  | Bird        | <i>E. gallinarum</i> | ---                 | <i>ermB-tetK-tetM-tetL-catA-vatD-vanA</i>                          | <i>esp-cylL</i>                        |
| A10(1) | Bird        | <i>E. faecium</i>    | QD-RD-FOS           | <i>ermB-tetL-vanA</i>                                              | <i>cylL</i>                            |

|         |         |                      |                                 |                                                                    |                                   |
|---------|---------|----------------------|---------------------------------|--------------------------------------------------------------------|-----------------------------------|
| A10(2)  | Bird    | <i>E. gallinarum</i> | RD                              | <i>ermB-tetM-tetL-aac(6')-aph(2'')-Ia-catA-vatE-vanA-ant(6)-Ia</i> | <i>esp-gelE-agg-cpd-cylA-cylL</i> |
| A11(1)  | Bird    | <i>E. faecalis</i>   | ERY-CIP-RD                      | -----                                                              | -----                             |
| A11(2)  | Bird    | <i>E. gallinarum</i> | TET-ERY- CIP-RD                 | <i>ermB-tetK-tetM-tetL-aac(6')-aph(2'')-Ia-ant(6)-Ia</i>           | <i>esp-gelE-agg-cpd-cylM-cylL</i> |
| A13(1)  | Bird    | <i>E. faecium</i>    | TET-ERY- RD                     | <i>ermB-tetL</i>                                                   | -----                             |
| A14(1)  | Bird    | <i>E. gallinarum</i> | QD-RD                           | <i>ermB-tetM-tetL-catA-vanA-ant(6)-Ia</i>                          | <i>esp-gelE-cylM-cylL</i>         |
| A14(3)  | Bird    | <i>E. gallinarum</i> | CIP-QD-RD-LNZ                   | <i>ermA-vatE-vanA-vanB</i>                                         | -----                             |
| A15(1)  | Bird    | <i>E. faecalis</i>   | TET-ERY-CIP-RD-LNZ              | <i>ermC-tetK-vanA-vanB</i>                                         | <i>agg</i>                        |
| A15(3)  | Bird    | <i>E. gallinarum</i> | TET-ERY-CIP-F-RD-LNZ            | <i>ermB-tetL-catA-vatE-vanA</i>                                    | <i>gelE-agg-cylA-cylL</i>         |
| A15(V1) | Bird    | <i>E. faecalis</i>   | ERY-CIP-F-RD                    | <i>ermC-vanA-vanB</i>                                              | <i>agg</i>                        |
| A15(V3) | Bird    | <i>E. faecalis</i>   | AMP-TET-ERY-CIP-QD-F-RD-LNZ     | <i>ermC-tetK-vatE-vanA-vanB</i>                                    | <i>agg</i>                        |
| A15(V4) | Bird    | <i>E. faecalis</i>   | AMP-TET-ERY-CIP-QD-F-RD-FOS-LNZ | <i>tetK-vanA-vanB</i>                                              | <i>agg</i>                        |
| A21(2)  | Bird    | <i>E. faecium</i>    | ERY-CIP-C-QD-LNZ                | <i>vanA-vanB</i>                                                   | <i>agg</i>                        |
| A23(2)  | Bird    | <i>E. gallinarum</i> | CIP-QD-F-RD                     | <i>ermB-tetK-tetM-tetL-vanB-ant(6)-Ia</i>                          | <i>esp-cpd-cylA-cylL</i>          |
| A24(1)  | Bird    | <i>E. faecium</i>    | TET-CIP-QD-RD-LNZ               | <i>ermB-ermC-tetK-tetL</i>                                         | -----                             |
| A24(3)  | Bird    | <i>E. faecalis</i>   | CIP-QD-F-RD-LNZ                 | <i>tetM-tetL</i>                                                   | <i>esp-cylL</i>                   |
| A26(1)  | Bird    | <i>E. faecium</i>    | AMP-TET-ERY-CIP-QD-RD-LNZ       | <i>ermB-tetK-tetL</i>                                              | -----                             |
| A26(2)  | Bird    | <i>E. faecalis</i>   | TET-ERY-CIP-C-QD-RD-LNZ         | <i>ermB-tetM-tetL</i>                                              | <i>esp-gelE-cylM-cylL</i>         |
| A26(3)  | Bird    | <i>E. faecalis</i>   | TET-CIP-QD-RD-LNZ               | <i>ermB-tetK-tetM</i>                                              | <i>esp-gelE-agg-cylA-cylM</i>     |
| R1(2)   | Reptile | <i>E. gallinarum</i> | TET-ERY-CIP-QD-F-RD             | <i>ermB-tetK-tetL</i>                                              | <i>esp-cpd-cylL</i>               |
| R2(1)   | Reptile | <i>E. gallinarum</i> | CIP-F-RD-LNZ                    | <i>catA-vatE-vanA</i>                                              | <i>gelE-agg-cylL</i>              |
| R2(2)   | Reptile | <i>E. faecium</i>    | ERY-CIP-RD                      | <i>ermA-vanB</i>                                                   | -----                             |
| R3(2)   | Reptile | <i>E. gallinarum</i> | ----                            | <i>ermB-tetK-tetM-catA-vanA-ant(6)-Ia</i>                          | <i>esp-gelE-agg-cpd-cylL</i>      |
| R6(1)   | Reptile | <i>E. faecalis</i>   | CIP-RD                          | <i>ermB-vatE-vanB</i>                                              | -----                             |
| R6(2)   | Reptile | <i>E. faecium</i>    | CIP-RD                          | <i>vatE</i>                                                        | -----                             |
| R6(4)   | Reptile | <i>E. faecium</i>    | CIP-RD                          | -----                                                              | -----                             |
